# Supplementary material for: Assessing the Methods, Tools, and Statistical Approaches in Google Trends Research: Systematic Review
Source: PubMed Central journal article supplement (PMC6246971; doi:10.2196/jmir.9366), 2018-11-06
Supplement: jmir_v20i11e270_app1.pdf [file jmir_v20i11e270_app1.pdf]

## Multimedia Appendix 1. Publication details and categorization.

|    | Authors                 | Period     | Region                                                                       | Keywords                                         | V | S | C | F | M | St | Languages                            |
|----|-------------------------|------------|------------------------------------------------------------------------------|--------------------------------------------------|---|---|---|---|---|----|--------------------------------------|
| 1  | Alicino et al 2015      | 2013-2015  | Guinea, Sierra Leone, Liberia, Nigeria, Mali, Senegal, USA, Spain, UK, Italy | Ebola                                            | ✓ |   | ✓ |   | ✓ |    | English, African languages (no data) |
| 2  | Arora et al 2016        | 2004-2013  | UK                                                                           | Suicide                                          | ✓ |   | ✓ |   |   |    | English                              |
| 3  | Bakker et al 2016       | 2004-2015  | Worldwide (36 Countries)                                                     | Chicken Pox, Varicella Zoster Virus, Vaccination | ✓ | ✓ | ✓ | ✓ | ✓ |    | Multiple Languages                   |
| 4  | Barnes et al 2015       | 2008-2013  | USA                                                                          | Sleep, Moral Awareness                           | ✓ |   |   |   | ✓ |    | English                              |
| 5  | Bentley & Ormerod, 2009 | 2005, 2009 | Worldwide                                                                    | Bird Flu, Swine Flu                              | ✓ |   |   |   | ✓ |    | English                              |
| 6  | Borron et al 2016       | 2009-2015  | USA                                                                          | Loperamide                                       | ✓ |   |   |   |   |    | English                              |
| 7  | Bragazzi, 2013          | 2004-2012  | Italy                                                                        | Multiple Sclerosis                               | ✓ |   | ✓ |   | ✓ |    | Italian                              |
| 8  | Bragazzi et al 2016     | 2004-2010  | USA                                                                          | Silicosis                                        | ✓ |   | ✓ |   |   |    | English                              |
| 9  | Bragazzi et al 2016     | 2004-2015  | Worldwide                                                                    | Vaccination                                      | ✓ |   |   |   |   |    | English                              |
| 10 | Bragazzi et al 2016     | 2004-2015  | Italy                                                                        | West Nile Virus                                  | ✓ |   | ✓ |   |   |    | Italian                              |
| 11 | Bragazzi et al 2016     | 2004-2015  | Worldwide                                                                    | Epilepsy                                         | ✓ |   | ✓ |   |   |    | English                              |
| 12 | Bragazzi et al 2016     | 2004-2015  | Worldwide                                                                    | Silicosis                                        | ✓ |   | ✓ |   |   | ✓  | English                              |
| 13 | Bragazzi et al 2016     | 2004-2016  | Worldwide, USA                                                               | Vasculitis, Autoimmune Diseases, Celebrity       | ✓ |   | ✓ |   |   | ✓  | English                              |
| 14 | Bragazzi, 2014          | 2004-2012  | Italy                                                                        | Non-Suicidal Self Injury (NSSI)                  | ✓ |   | ✓ |   |   |    | Italian                              |
| 15 | Braun & Harreus, 2013   | 2005-2012  | Germany                                                                      | Otolaryngology, Sinusitis                        | ✓ | ✓ |   |   |   |    | German                               |
| 16 | Brigo & Trinka, 2015    | 2004-2014  | Worldwide                                                                    | Epilepsy                                         | ✓ |   |   |   |   |    | English                              |
| 17 | Brigo et al 2014        | 2004-2013  | Worldwide                                                                    | Epilepsy                                         | ✓ |   |   |   |   |    | English                              |
| 18 | Brigo et al 2014        | 2004-2013  | Worldwide                                                                    | Multiple Sclerosis, Epilepsy, Dementia           | ✓ |   |   |   |   |    | English                              |
| 19 | Van Campen et al 2014   | 2004-2013  | Netherlands, USA, UK                                                         | Epilepsy, Seizures                               | ✓ |   |   |   |   | ✓  | English, Dutch                       |

|    | <b>Authors</b>             | <b>Period</b> | <b>Region</b>                           | <b>Keywords</b>                                                                        | <b>V</b> | <b>S</b> | <b>C</b> | <b>F</b> | <b>M</b> | <b>St</b> | <b>Languages</b>      |
|----|----------------------------|---------------|-----------------------------------------|----------------------------------------------------------------------------------------|----------|----------|----------|----------|----------|-----------|-----------------------|
| 20 | Carneiro & Mylonakis, 2009 | 2004-2009     | Worldwide, USA                          | Influenza, Flu, West Nile virus, Bird Flu, Respiratory Syncytial Virus (RSV), Bird Flu | ✓        |          |          |          |          |           | English               |
| 21 | Cavazos-Regh et al 2015    | 2011          | USA                                     | Tobacco                                                                                | ✓        |          | ✓        |          |          |           | English               |
| 22 | Cha & Stow, 2015           | 2004-2014     | USA                                     | Toledo Water Crisis, Algae                                                             | ✓        |          |          |          |          |           | English               |
| 23 | Chaves et al 2015          | 2004-2012     | Worldwide                               | Tele-health, Newborn Hearing Screening                                                 |          |          |          |          |          |           | Portuguese            |
| 24 | Cho et al 2013             | 2007-2012     | South Korea                             | Influenza (Flu, New Flu, Swine Flu, New Influenza, Fever, Tamiflu)                     | ✓        |          | ✓        |          |          |           | Korean                |
| 25 | Crowson et al 2016         | 2008-2015     | USA                                     | Otitis Externa, Ototoxicity, Ciprodex, Cortisporin, Ofloxacin                          | ✓        | ✓        | ✓        |          |          | ✓         | English               |
| 26 | Davis et al 2015           | 2005-2015     | Worldwide                               | Interstitial Cystitis, Painful Bladder Syndrome                                        | ✓        |          |          |          |          |           | English               |
| 27 | Fazeli et al 2014          | 2004-2014     | USA                                     | Breast Cancer, Dense Breast                                                            | ✓        |          |          |          |          |           | English               |
| 28 | Deiner et al 2016          | 2012-2014     | USA, Australia                          | Pink Eye, Eye Allergy, Flu, Eye Drops, Eye Diseases                                    | ✓        | ✓        | ✓        |          |          |           | English               |
| 29 | DeVilbiss & Lee, 2014      | 2004-2014     | USA                                     | Autism Awareness, Autism, Asperger's, ADHD                                             | ✓        |          |          |          |          |           | English               |
| 30 | Domnich et al 2015         | 2011-2015     | Italy                                   | Influenza, Fever, Cough, Tachipirina, Paracetamol                                      | ✓        |          | ✓        | ✓        | ✓        |           | Italian               |
| 31 | El-Sheikha, 2015           | 2006-2013     | Worldwide, 44 countries                 | Varicose Vein Syndrome                                                                 | ✓        | ✓        |          |          | ✓        | ✓         | English, 32 languages |
| 32 | Fenichel et al 2013        | 2008-2010     | USA                                     | Pandemic Influenza, Swine Flu                                                          | ✓        |          |          |          | ✓        |           | English               |
| 33 | Fond et al 2015            | 2005-2014     | Worldwide                               | Suicide, Depression, Bipolar                                                           | ✓        |          |          |          |          |           | English               |
| 34 | Foroughi et al 2016        | 2004-2015     | Australia, Canada, New Zealand, UK, USA | Cancer                                                                                 | ✓        |          | ✓        |          |          |           | English               |
| 35 | Gafson & Giovannoni, 2014  | 2008-2012     | Worldwide                               | Chronic Cerebrospinal Venous Insufficiency                                             | ✓        |          |          |          |          |           | English               |

|    | <b>Authors</b>          | <b>Period</b> | <b>Region</b>                          | <b>Keywords</b>                                            | <b>V</b> | <b>S</b> | <b>C</b> | <b>F</b> | <b>M</b> | <b>St</b> | <b>Languages</b>         |
|----|-------------------------|---------------|----------------------------------------|------------------------------------------------------------|----------|----------|----------|----------|----------|-----------|--------------------------|
| 36 | Gahr et al 2015         | 2004-2013     | Germany                                | Antidepressants, Prescriptions                             | ✓        |          | ✓        |          | ✓        |           | German                   |
| 37 | Gamma et al 2016        | 2004-2016     | Switzerland, Germany, Austria          | Drugs, Methamphetamine Crime                               | ✓        |          | ✓        |          |          |           | German (same in English) |
| 38 | Garrison et al 2015     | 2004-2012     | USA, Australia                         | Leg cramps                                                 | ✓        | ✓        |          |          | ✓        |           | English                  |
| 39 | Gollust et al 2016      | 2013-2014     | USA                                    | Affordable Care Act, Health Insurance, Obamacare           | ✓        |          | ✓        |          | ✓        |           | English                  |
| 40 | Guernier et al 2016     | 2011-2013     | Australia                              | Veterinary Diseases, Tick Paralysis                        | ✓        |          | ✓        |          |          |           | English                  |
| 41 | Haney et al 2014        | 2004-2013     | USA                                    | Radiology Residency, Radiology Salary                      | ✓        |          |          |          | ✓        |           | English                  |
| 42 | Harorli & Harorli, 2014 | 2004-2014     | Worldwide                              | Oral problems                                              | ✓        |          |          |          |          |           | English                  |
| 43 | Harsha et al 2014       | 2004-2012     | USA                                    | Varicose Vein Syndrome                                     | ✓        | ✓        |          |          | ✓        | ✓         | English                  |
| 44 | Harsha et al 2015       | 2006-2013     | USA                                    | Interventional Radiology, Fellowships                      | ✓        | ✓        |          |          | ✓        |           | English                  |
| 45 | Hassid et al 2016       | 2008-2011     | USA                                    | Gastrointestinal Symptoms                                  | ✓        | ✓        | ✓        |          |          |           | English                  |
| 46 | Hossain et al 2016      | 2014          | Guinea, Liberia, Sierra Leone, USA, UK | Ebola, Flu                                                 | ✓        |          |          |          |          |           | English                  |
| 47 | Huang et al 2013        | 2009-2011     | China                                  | Smoking, Smoking Ban, Electronic Cigarette                 | ✓        |          |          |          |          |           | Chinese                  |
| 48 | Huesch et al 2014       | 2012-2013     | USA                                    | Public Hospitals, Quality, Ratings                         | ✓        |          |          |          |          |           | English                  |
| 49 | Ingram & Plante, 2013   | 2004-2012     | USA, Australia, UK, Canada, Germany    | Restless Legs Syndrome                                     | ✓        | ✓        |          |          |          |           | English                  |
| 50 | Ingram et al 2015       | 2006-2012     | USA, Australia                         | Breathing Sleep Disorder                                   | ✓        | ✓        |          |          |          |           | English                  |
| 51 | Jha et al 2015          | 2004-2015     | USA                                    | Oral Bisphosphonate, Prescriptions, Hip Fractures, Fosamax | ✓        |          |          |          |          |           | English                  |
| 52 | Johnson et al 2014      | 2005-2011     | USA                                    | Sexually Transmitted Infections                            | ✓        |          | ✓        |          |          |           | English                  |
| 53 | Kadry et al 2011        | 2010          | USA                                    | Physician Rating                                           |          |          |          |          |          |           | English                  |
| 54 | Kang et al 2013         | 2008-2011     | China                                  | Influenza, ILI, Flu, H1N1                                  | ✓        |          | ✓        |          |          |           | Chinese                  |

|    | Authors                  | Period    | Region                                           | Keywords                                                                                         | V | S | C | F | M | St | Languages                                   |
|----|--------------------------|-----------|--------------------------------------------------|--------------------------------------------------------------------------------------------------|---|---|---|---|---|----|---------------------------------------------|
| 55 | Kang et al 2015          | 2008-2013 | USA, UK, Australia                               | Allergic Rhinitis, Allergic Rhinitis, Pollen count, Claritin, Zyrtec                             | ✓ | ✓ | ✓ |   |   |    | English                                     |
| 56 | Koburger et al 2015      | 2009-2010 | Germany, Austria, Hungary, Netherlands, Slovenia | Suicide, Robert Enke                                                                             | ✓ |   | ✓ |   |   |    | German, Hungarian, Dutch, Slovenian         |
| 57 | Kostkova et al 2013      | 2006-2010 | UK                                               | Infectious diseases, Clostridium difficile, MRSA, Tuberculosis, Meningitis, Norovirus, Influenza | ✓ |   |   |   |   |    | English                                     |
| 58 | Lawson McLean et al 2016 | 2004-2014 | Worldwide, Germany                               | Neurosurgery                                                                                     | ✓ |   |   |   |   |    | English                                     |
| 59 | Leffler et al 2010       | 2004-2008 | USA, UK, Canada, Australia                       | Ophthalmology                                                                                    | ✓ | ✓ |   |   | ✓ |    | English                                     |
| 60 | Ling & Lee, 2016         | 2004-2015 | Canada                                           | Health Campaigns, HIV, AIDS, Stroke, Colorectal Cancer, Marijuana use                            | ✓ |   | ✓ |   |   |    | English                                     |
| 61 | Linkov et al 2014        | 2004-2012 | Worldwide, USA                                   | Bariatric Surgery                                                                                | ✓ |   |   |   | ✓ |    | English                                     |
| 62 | Liu et al 2016           | 2004-2016 | USA, Australia                                   | Ankle Swelling                                                                                   | ✓ | ✓ |   |   | ✓ |    | English                                     |
| 63 | Luckett et al 2016       | 2015      | Worldwide                                        | Chronic Breathlessness                                                                           |   |   |   |   |   |    | English                                     |
| 64 | Majumder et al 2016      | 2015-2016 | Colombia                                         | Zika Virus                                                                                       | ✓ |   |   |   | ✓ |    | Spanish                                     |
| 65 | Mattin et al 2014        | 2007-2013 | France, Greece, Italy, Portugal, Spain           | Canine Leishmaniosis                                                                             | ✓ |   |   |   |   |    | French, Greek, Italian, Portuguese, Spanish |
| 66 | Mavragani et al 2016     | 2004-2014 | UK, Worldwide                                    | Drugs, Prescriptions, Diclofenac, Estradiol, Macrolide Antibiotics                               | ✓ |   | ✓ |   |   |    | English                                     |
| 67 | Murray et al 2016        | 2010-2013 | Ireland                                          | Mouth Cancer, Oral Cancer                                                                        | ✓ |   |   |   |   | ✓  | English                                     |
| 68 | Myers et al 2016         | 2004-2015 | USA                                              | Psychogenic Non-Epileptic Seizures                                                               | ✓ |   |   |   |   |    | English                                     |
| 69 | Noar et al 2013          | 2006-2011 | USA                                              | Pancreatic Cancer, Public Figure                                                                 | ✓ |   |   |   | ✓ | ✓  | English                                     |
| 70 | Nuti et al 2014          | 2004-2014 | Worldwide                                        | Review                                                                                           | - | - | - | - | - | -  | -                                           |

|    | Authors                    | Period    | Region                                                                           | Keywords                                                                                                                                | V | S | C | F | M | St | Languages                                             |
|----|----------------------------|-----------|----------------------------------------------------------------------------------|-----------------------------------------------------------------------------------------------------------------------------------------|---|---|---|---|---|----|-------------------------------------------------------|
| 71 | Pandey et al 2014          | 2004-2013 | USA                                                                              | Heart Transplant, Ventricular Assist Devices, Breast Cancer, Pulmonary Embolism, Bipolar Disorder, Sjogren Syndrome, Multiple Sclerosis | ✓ |   |   |   |   |    | English                                               |
| 72 | Parker et al 2016          | 2010-2014 | USA                                                                              | Premature Deaths, Alcohol, Drugs, Suicide                                                                                               | ✓ |   |   | ✓ | ✓ |    | English                                               |
| 73 | Phelan et al 2014          | 2009-2012 | USA, UK, Australia, Ireland                                                      | Metal-on-Metal Hip                                                                                                                      | ✓ |   |   |   | ✓ | ✓  | English                                               |
| 74 | Phelan et al 2016          | 2010-2015 | USA                                                                              | Anatomy, Education                                                                                                                      | ✓ | ✓ | ✓ |   | ✓ |    | English                                               |
| 75 | Plante & Ingram, 2014      | 2004-2013 | USA, Australia, Germany, UK, Canada, Sweden, Switzerland                         | Tinnitus Symptomatology                                                                                                                 | ✓ | ✓ |   |   |   |    | English, German, Swedish, French, Italian             |
| 76 | Poletto et al 2016         | 2013-2015 | Worldwide                                                                        | Middle East Respiratory Syndrome (MERS)                                                                                                 | ✓ |   | ✓ |   |   |    | English                                               |
| 77 | Pollett et al 2015         | 2009-2014 | USA                                                                              | Pertussis                                                                                                                               | ✓ |   | ✓ | ✓ | ✓ |    | English                                               |
| 78 | Rohart et al 2016          | 2009-2013 | Australia                                                                        | Disease Surveillance                                                                                                                    | ✓ |   | ✓ | ✓ | ✓ | ✓  | English                                               |
| 79 | Rosenkrantz & Prabhu, 2016 | 2004-2014 | USA                                                                              | Imaging-Based Cancer Screening, Breast Cancer, Lung Cancer, Colon Cancer, Prostate Cancer                                               | ✓ |   |   |   |   |    | English                                               |
| 80 | Rossignol et al 2013       | 2004-2012 | France, Germany, Italy, USA, China, Australia, Brazil, South Africa              | Urinary Tract Infection, Cystitis                                                                                                       | ✓ | ✓ |   |   |   |    | English, French, German, Italian, Chinese, Portuguese |
| 81 | Scatà et al 2016           | 2015-2016 | 56 countries in South America, Europe, Oceania                                   | Epidemics, Zika Virus                                                                                                                   | ✓ |   |   |   | ✓ |    | N/A. The term is the same                             |
| 82 | Scheres et al 2016         | 2009-2015 | Netherlands, Worldwide                                                           | Thrombosis, Venous Thrombosis                                                                                                           | ✓ |   |   |   |   |    | English, Dutch                                        |
| 83 | Shin et al 2016            | 2015-2016 | Korea                                                                            | MERS                                                                                                                                    | ✓ |   | ✓ |   |   |    | Korean                                                |
| 84 | Schootman et al 2015       | 2004-2014 | 50 US States and DC, Puerto Rico, US Virgin Islands, Guam, American Samoa, Palau | Cancer Screening                                                                                                                        | ✓ |   | ✓ |   |   |    | English                                               |

|     | <b>Authors</b>           | <b>Period</b> | <b>Region</b>                     | <b>Keywords</b>                               | <b>V</b> | <b>S</b> | <b>C</b> | <b>F</b> | <b>M</b> | <b>St</b> | <b>Languages</b> |
|-----|--------------------------|---------------|-----------------------------------|-----------------------------------------------|----------|----------|----------|----------|----------|-----------|------------------|
| 85  | Schuster et al 2010      | 2004-2009     | USA                               | Statins, Lipitor, Simvastatin                 | ✓        |          | ✓        |          | ✓        |           | English          |
| 86  | Seifter et al 2010       | 2004-2009     | USA                               | Lyme Disease                                  | ✓        | ✓        |          |          |          |           | English          |
| 87  | Sentana-Lledo et al 2016 | 2004-2014     | USA                               | Bed bugs                                      | ✓        | ✓        | ✓        |          |          |           | English          |
| 88  | Simmering et al 2014     | 2004-2014     | USA                               | Drugs, Prescriptions, Antibiotics             | ✓        |          | ✓        |          |          |           | English          |
| 89  | Skeldon et al 2015       | 2004-2007     | USA                               | Drugs, Prostatic Hyperplasia, Avodart, Flomax | ✓        |          |          |          |          |           | English          |
| 90  | Solano et al 2016        | 2008-2012     | Italy                             | Suicide                                       | ✓        |          | ✓        | ✓        |          |           | Italian          |
| 91  | Stein et al 2013         | 2007-2010     | USA, UK, Canada, India            | Laser Eye Surgery                             | ✓        |          |          |          | ✓        |           | English          |
| 92  | Takada, 2012             | 2004-2011     | Japan                             | Fireflies, Beetles                            | ✓        | ✓        |          |          |          |           | Japanese         |
| 93  | Telfer & Woodburn, 2015  | 2004-2014     | UK, USA, Canada, Australia        | Foot pain, Ankle pain, Heel pain              | ✓        | ✓        |          |          | ✓        | ✓         | English          |
| 94  | Troelstra et al 2016     | 2004-2013     | Netherlands, Belgium              | Tobacco Control                               | ✓        |          |          |          | ✓        | ✓         | Dutch            |
| 95  | Toosi & Kalia, 2015      | 2004-2013     | Canada, USA, Australia            | Tanning                                       | ✓        | ✓        |          |          |          |           | English          |
| 96  | Wang et al 2015          | 2009-2011     | Taiwan                            | Dementia, Alzheimer's Disease, Neurology      | ✓        |          | ✓        | ✓        |          |           | Chinese          |
| 97  | Warren & Wen, 2016       | 2004-2015     | USA                               | Measles, MMR, Vaccine                         | ✓        |          |          |          |          |           | English          |
| 98  | Willson et al 2015       | 2011-2012     | USA                               | Aeroallergens, Allergies, Pollen              | ✓        | ✓        | ✓        |          | ✓        |           | English          |
| 99  | Willson et al 2015       | 2011-2014     | USA                               | Pollen, Mountain Cedar                        | ✓        |          |          |          | ✓        |           | English          |
| 100 | Yang et al 2015          | 2009-2015     | USA                               | Influenza, Epidemic                           | ✓        |          |          |          | ✓        |           | English          |
| 101 | Zhang et al 2015         | 2004-2014     | USA, Canada, UK, Australia, China | Tobacco, Lung Cancer                          | ✓        | ✓        | ✓        |          |          | ✓         | English, Chinese |
| 102 | Zhang et al 2016         | 2004-2015     | USA                               | Drugs, Dabbing, Cannabis Smoking              | ✓        |          | ✓        | ✓        |          | ✓         | English          |
| 103 | Zheluk et al 2014        | 2009-2013     | Russia                            | Drugs, Krokodil, Desomorphine, Codeine        | ✓        |          |          |          |          |           | Russian          |
| 104 | Zhou et al 2011          | 2004-2009     | USA                               | Tuberculosis                                  | ✓        |          |          | ✓        | ✓        |           | English          |

## References

1. Alicino C, Bragazzi NL, Faccio V, Amicizia D, Panatto D, Gasparini R, et al. Assessing Ebola-related web search behaviour: insights and implications from an analytical study of Google Trends-based query volumes. *Infect Dis Poverty* 2015 Dec 10;4:54 [FREE Full text] [doi: 10.1186/s40249-015-0090-9] [Medline: 26654247]
2. Arora VS, Stuckler D, McKee M. Tracking search engine queries for suicide in the United Kingdom, 2004-2013. *Public Health* 2016 Aug;137:147-153. [doi: 10.1016/j.puhe.2015.10.015] [Medline: 26976489]
3. Bakker KM, Martinez-Bakker ME, Helm B, Stevenson TJ. Digital epidemiology reveals global childhood disease seasonality and the effects of immunization. *PNAS* 2016;113(24):6689.
4. Barnes CM, Gunia BC, Wagner DT. Sleep and moral awareness. *J Sleep Res* 2015 Apr;24(2):181-188 [FREE Full text] [doi: 10.1111/jsr.12231] [Medline: 25159702]
5. Bentley RA, Ormerod P. Social versus independent interest in 'bird flu' and 'swine flu'. *PLoS Curr* 2009 Sep 3;1:RRN1036. [doi: 10.1371/currents.RRN1036]
6. Borron SW, Watts SH, Tull J, Baeza S, Diebold S, Barrow A. Intentional Misuse and Abuse of Loperamide: A New Look at a Drug with 'Low Abuse Potential'. *J Emerg Med* 2017 Jul;53(1):73-84. [doi: 10.1016/j.jemermed.2017.03.018] [Medline: 28501383]
7. Bragazzi NL. Infodemiology and infoveillance of multiple sclerosis in Italy. *Mult Scler Int* 2013;2013:924029 [FREE Full text] [doi: 10.1155/2013/924029] [Medline: 24027636]
8. Bragazzi NL, Dini G, Toletone A, Brigo F, Durando P. Infodemiological data concerning silicosis in the USA in the period 2004-2010 correlating with real-world statistical data. *Data Brief* 2017 Feb;10:457-464 [FREE Full text] [doi: 10.1016/j.dib.2016.11.021] [Medline: 28054008]
9. Bragazzi NL, Barberis I, Rosselli R, Gianfredi V, Nucci D, Moretti M, et al. How often people google for vaccination: Qualitative and quantitative insights from a systematic search of the web-based activities using Google Trends. *Hum Vaccin Immunother* 2017 Feb;13(2):464-469. [doi: 10.1080/21645515.2017.1264742] [Medline: 27983896]
10. Bragazzi N, Bacigaluppi S, Robba C, Siri A, Canepa G, Brigo F. Infodemiological data of West-Nile virus disease in Italy in the study period 2004-2015. *Data Brief* 2016:839-845 [FREE Full text]
11. Bragazzi NL, Bacigaluppi S, Robba C, Nardone R, Trinkka E, Brigo F. Infodemiology of status epilepticus: A systematic validation of the Google Trends-based search queries. *Epilepsy Behav* 2016 Feb;55:120-123. [doi: 10.1016/j.yebeh.2015.12.017] [Medline: 26773681]
12. Bragazzi NL, Dini G, Toletone A, Brigo F, Durando P. Leveraging Big Data for Exploring Occupational Diseases-Related Interest at the Level of Scientific Community, Media Coverage and Novel Data Streams: The Example of Silicosis as a Pilot Study. *PLoS One* 2016;11(11):e0166051 [FREE Full text] [doi: 10.1371/journal.pone.0166051] [Medline: 27806115]
13. Bragazzi NL, Watad A, Brigo F, Adawi M, Amital H, Shoenfeld Y. Public health awareness of autoimmune diseases after the death of a celebrity. *Clin Rheumatol* 2016 Dec 20:1911-1917. [doi: 10.1007/s10067-016-3513-5] [Medline: 28000011]
14. Bragazzi NL. A Google Trends-based approach for monitoring NSSI. *Psychol Res Behav Manag* 2013 Dec;7:1-8 [FREE Full text] [doi: 10.2147/PRBM.S44084] [Medline: 24376364]
15. Braun T, Harréus U. Medical nowcasting using Google Trends: application in otolaryngology. *Eur Arch Otorhinolaryngol* 2013 Jul;270(7):2157-2160. [doi: 10.1007/s00405-013-2532-y] [Medline: 23632877]
16. Brigo F, Trinkka E. Google search behavior for status epilepticus. *Epilepsy Behav* 2015 Aug;49:146-149. [doi: 10.1016/j.yebeh.2015.02.029] [Medline: 25873438]
17. Brigo F, Igwe SC, Ausserer H, Nardone R, Tezzon F, Bongiovanni LG, et al. Why do people Google epilepsy? An infodemiological study of online behavior for epilepsy-related search terms. *Epilepsy Behav* 2014 Feb;31:67-70. [doi: 10.1016/j.yebeh.2013.11.020] [Medline: 24361764]
18. Brigo F, Lochner P, Tezzon F, Nardone R. Web search behavior for multiple sclerosis: An infodemiological study. *Multiple Sclerosis and Related Disorders* 2014 Jul;3(4):440-443. [doi: 10.1016/j.msard.2014.02.005]

19. van CJS, van DE, Otte WM, Joels M, Jansen FE, Braun KPJ. Does Saint Nicholas provoke seizures? Hints from Google Trends. *Epilepsy Behav* 2014 Mar;32:132-134. [doi: 10.1016/j.yebeh.2014.01.019] [Medline: 24548849]
20. Carneiro HA, Mylonakis E. Google trends: a web-based tool for real-time surveillance of disease outbreaks. *Clin Infect Dis* 2009 Nov 15;49(10):1557-1564 [FREE Full text] [doi: 10.1086/630200] [Medline: 19845471]
21. Cavazos-Rehg PA, Krauss MJ, Spitznagel EL, Lowery A, Gruzca RA, Chaloupka FJ, et al. Monitoring of non-cigarette tobacco use using Google Trends. *Tob Control* 2015 May;24(3):249-255 [FREE Full text] [doi: 10.1136/tobaccocontrol-2013-051276] [Medline: 24500269]
22. Cha Y, Stow CA. Mining web-based data to assess public response to environmental events. *Environ Pollut* 2015 Mar;198:97-99. [doi: 10.1016/j.envpol.2014.12.027] [Medline: 25577650]
23. Chaves JN, Libardi AL, Agostinho-Pesse RS, Morettin M, Alvarenga KDF. Tele-health: assessment of websites on newborn hearing screening in Portuguese Language. *Codas* 2015 Dec;27(6):526-533 [FREE Full text] [doi: 10.1590/2317-1782/20152014169] [Medline: 26691616]
24. Cho S, Sohn CH, Jo MW, Shin S, Lee JH, Ryoo SM, et al. Correlation between national influenza surveillance data and google trends in South Korea. *PLoS One* 2013 Dec;8(12):e81422 [FREE Full text] [doi: 10.1371/journal.pone.0081422] [Medline: 24339927]
25. Crowson MG, Schulz K, Tucci DL. National Utilization and Forecasting of Otological Antibiotics. *Otology & Neurotology* 2016;37(8):1049-1054. [doi: 10.1097/MAO.0000000000001115]
26. Davis NF, Gnanappiragasam S, Thornhill JA. Interstitial cystitis/painful bladder syndrome: the influence of modern diagnostic criteria on epidemiology and on Internet search activity by the public. *Transl Androl Urol* 2015 Oct;4(5):506-511 [FREE Full text] [doi: 10.3978/j.issn.2223-4683.2015.06.08] [Medline: 26816850]
27. Fazeli DS, Carlos RC, Hall KS, Dalton VK. Novel data sources for women's health research: mapping breast screening online information seeking through Google trends. *Acad Radiol* 2014 Sep;21(9):1172-1176 [FREE Full text ] [doi: 10.1016/j.acra.2014.05.005 ] [Medline: 24998689]
28. Deiner MS, Lietman TM, McLeod SD, Chodosh J, Porco TC. Surveillance Tools Emerging From Search Engines and Social Media Data for Determining Eye Disease Patterns. *JAMA Ophthalmol* 2016 Sep 01;134(9):1024-1030 [FREE Full text] [doi: 10.1001/jamaophthalmol.2016.2267] [Medline: 27416554]
29. DeVilbiss E, Lee B. Brief Report: Trends in U.S. National Autism Awareness from 2004 to 2014: The Impact of National Autism Awareness Month. *Journal of Autism and Developmental Disorders* 2014;44(12):3271-3273. [doi: 10.1007/s10803-014-2160-4] [Medline: 24915931]
30. Domnich A, Panatto D, Signori A, Lai PL, Gasparini R, Amicizia D. Age-related differences in the accuracy of web query-based predictions of influenza-like illness. *PLoS One* 2015;10(5):e0127754 [FREE Full text] [doi: 10.1371/journal.pone.0127754] [Medline: 26011418]
31. El-Sheikha J. Global search demand for varicose vein information on the internet. *Phlebology* 2015 Sep;30(8):533-540. [doi: 10.1177/0268355514542681] [Medline: 24993972]
32. Fenichel EP, Kuminoff NV, Chowell G. Skip the trip: air travelers' behavioral responses to pandemic influenza. *PLoS One* 2013 Mar;8(3):e58249 [FREE Full text] [doi: 10.1371/journal.pone.0058249] [Medline: 23526970]
33. Fond G, Gaman A, Brunel L, Haffen E, Llorca P. Google Trends &reg; : Ready for real-time suicide prevention or just a Zeta-Jones effect? An exploratory study. *Psychiatry Research* 2015 Aug;228(3):913-917. [doi: 10.1016/j.psychres.2015.04.022]
34. Foughi F, Lam AK, Lim MS, Saremi N, Ahmadvand A. "Googling" for Cancer: An Infodemiological Assessment of Online Search Interests in Australia, Canada, New Zealand, the United Kingdom, and the United States. *JMIR Cancer* 2016 May 04;2(1):e5 [FREE Full text] [doi: 10.2196/cancer.5212] [Medline: 28410185]
35. Gafson AR, Giovannoni G. CCSVI-A. A call to clinicians and scientists to vocalise in an Internet age. *Mult Scler Relat Disord* 2014 Mar;3(2):143-146. [doi: 10.1016/j.msard.2013.10.005] [Medline: 25878001]

36. Gahr M, Uzelac Z, Zeiss R, Connemann BJ, Lang D, Schönfeldt-Lecuona C. Linking Annual Prescription Volume of Antidepressants to Corresponding Web Search Query Data: A Possible Proxy for Medical Prescription Behavior? *J Clin Psychopharmacol* 2015 Dec;35(6):681-685. [doi: 10.1097/JCP.0000000000000397] [Medline: 26355849]
37. Gamma A, Schleifer R, Weinmann W, Buadze A, Liebrez M. Could Google Trends Be Used to Predict Methamphetamine-Related Crime? An Analysis of Search Volume Data in Switzerland, Germany, and Austria. *PLoS ONE* 2016 Nov 30;11(11):e0166566. [doi: 10.1371/journal.pone.0166566]
38. Garrison SR, Dormuth CR, Morrow RL, Carney GA, Khan KM. Seasonal effects on the occurrence of nocturnal leg cramps: a prospective cohort study. *CMAJ* 2015 Mar 03;187(4):248-253 [FREE Full text] [doi: 10.1503/cmaj.140497] [Medline: 25623650]
39. Gollust SE, Qin X, Wilcock AD, Baum LM, Barry CL, Niederdeppe J, et al. Search and You Shall Find: Geographic Characteristics Associated With Google Searches During the Affordable Care Act's First Enrollment Period. *Med Care Res Rev* 2017 Dec;74(6):723-735. [doi: 10.1177/1077558716660944] [Medline: 27457426]
40. Guernier V, Milinovich GJ, Bezerra SMA, Haworth M, Coleman G, Soares MRJ. Use of big data in the surveillance of veterinary diseases: early detection of tick paralysis in companion animals. *Parasit Vectors* 2016 Dec 23;9(1):303 [FREE Full text] [doi: 10.1186/s13071-016-1590-6] [Medline: 27215214]
41. Haney NM, Kinsella SD, Morey JM. United States medical school graduate interest in radiology residency programs as depicted by online search tools. *J Am Coll Radiol* 2014 Feb;11(2):193-197. [doi: 10.1016/j.jacr.2013.06.023] [Medline: 24120904]
42. Harorli OT, Harorli H. Evaluation of internet search trends of some common oral problems, 2004 to 2014. *Community Dental Health* 2014;31(3):188-192. [doi: 10.1922/CDH\_3330Harorl?05]
43. Harsha AK, Schmitt JE, Stavropoulos SW. Know your market: use of online query tools to quantify trends in patient information-seeking behavior for varicose vein treatment. *J Vasc Interv Radiol* 2014 Jan;25(1):53-57. [doi: 10.1016/j.jvir.2013.09.015] [Medline: 24286941]
44. Harsha AK, Schmitt JE, Stavropoulos SW. Match day: online search trends reflect growing interest in IR training. *J Vasc Interv Radiol* 2015 Jan;26(1):95-100. [doi: 10.1016/j.jvir.2014.09.011] [Medline: 25541447]
45. Hassid BG, Day LW, Awad MA, Sewell JL, Osterberg EC, Breyer BN. Using Search Engine Query Data to Explore the Epidemiology of Common Gastrointestinal Symptoms. *Dig Dis Sci* 2017 Dec;62(3):588-592. [doi: 10.1007/s10620-016-4384-y] [Medline: 27878646]
46. Hossain L, Kam D, Kong F, Wigand RT, Bossomaier T. Social media in Ebola outbreak. *Epidemiol Infect* 2016 Jul;144(10):2136-2143. [doi: 10.1017/S095026881600039X] [Medline: 26939535]
47. Huang J, Zheng R, Emery S. Assessing the impact of the national smoking ban in indoor public places in china: evidence from quit smoking related online searches. *PLoS One* 2013 Jun;8(6):e65577 [FREE Full text] [doi: 10.1371/journal.pone.0065577] [Medline: 23776504]
48. Huesch M, Chetlen A, Segel J, Schetter S. Frequencies of Private Mentions and Sharing of Mammography and Breast Cancer Terms on Facebook: A Pilot Study. *J Med Internet Res* 2017 Jun 09;19(6):e201 [FREE Full text] [doi: 10.2196/jmir.7508] [Medline: 28600279]
49. Ingram DG, Plante DT. Seasonal trends in restless legs symptomatology: evidence from Internet search query data. *Sleep Med* 2013 Dec;14(12):1364-1368. [doi: 10.1016/j.sleep.2013.06.016] [Medline: 24152798]
50. Ingram DG, Matthews CK, Plante DT. Seasonal trends in sleep-disordered breathing: evidence from Internet search engine query data. *Sleep Breath* 2015 Mar;19(1):79-84. [doi: 10.1007/s11325-014-0965-1] [Medline: 24595717]
51. Jha S, Wang Z, Laucis N, Bhattacharyya T. Trends in Media Reports, Oral Bisphosphonate Prescriptions, and Hip Fractures 1996-2012: An Ecological Analysis. *J Bone Miner Res* 2015 Dec;30(12):2179-2187 [FREE Full text] [doi: 10.1002/jbmr.2565] [Medline: 26018247]

52. Johnson AK, Mehta SD. A comparison of Internet search trends and sexually transmitted infection rates using Google trends. *Sex Transm Dis* 2014 Jan;41(1):61-63. [doi: 10.1097/OLQ.000000000000065] [Medline: 24326584]
53. Kadry B, Chu LF, Kadry B, Gammas D, Macario A. Analysis of 4999 online physician ratings indicates that most patients give physicians a favorable rating. *J Med Internet Res* 2011 Nov;13(4):e95 [FREE Full text] [doi: 10.2196/jmir.1960] [Medline: 22088924]
54. Kang M, Zhong H, He J, Rutherford S, Yang F. Using Google Trends for influenza surveillance in South China. *PLoS One* 2013;8(1):e55205 [FREE Full text] [doi: 10.1371/journal.pone.0055205] [Medline: 23372837]
55. Kang M, Song W, Choi S, Kim H, Ha H, Kim S, et al. Google unveils a glimpse of allergic rhinitis in the real world. *Allergy* 2015 Jan;70(1):124-128. [doi: 10.1111/all.12528] [Medline: 25280183]
56. Koburger N, Mergl R, Rummel-Kluge C, Ibelshäuser A, Meise U, Postuvan V, et al. Celebrity suicide on the railway network: Can one case trigger international effects? *J Affect Disord* 2015 Oct 01;185:38-46. [doi: 10.1016/j.jad.2015.06.037] [Medline: 26143403]
57. Kostkova P, Fowler D, Wiseman S, Weinberg JR. Major infection events over 5 years: how is media coverage influencing online information needs of health care professionals and the public? *J Med Internet Res* 2013 Jul 15;15(7):e107 [FREE Full text] [doi: 10.2196/jmir.2146] [Medline: 23856364]
58. Lawson MAC, Lawson MA, Kalff R, Walter J. Google Search Queries About Neurosurgical Topics: Are They a Suitable Guide for Neurosurgeons? *World Neurosurg* 2016 Jun;90:179-185. [doi: 10.1016/j.wneu.2016.02.045] [Medline: 26898496]
59. Leffler CT, Davenport B, Chan D. Frequency and seasonal variation of ophthalmology-related internet searches. *Can J Ophthalmol* 2010 Jun;45(3):274-279. [doi: 10.3129/i10-022] [Medline: 20436544]
60. Ling R, Lee J. Disease Monitoring and Health Campaign Evaluation Using Google Search Activities for HIV and AIDS, Stroke, Colorectal Cancer, and Marijuana Use in Canada: A Retrospective Observational Study. *JMIR Public Health Surveill* 2016 Oct 12;2(2):e156 [FREE Full text] [doi: 10.2196/publichealth.6504] [Medline: 27733330]
61. Linkov F, Bovbjerg DH, Freese KE, Ramanathan R, Eid GM, Gourash W. Bariatric surgery interest around the world: what Google Trends can teach us. *Surg Obes Relat Dis* 2014 May;10(3):533-538. [doi: 10.1016/j.soard.2013.10.007] [Medline: 24794184]
62. Liu F, Allan GM, Korownyk C, Kolber M, Flook N, Sternberg H, et al. Seasonality of Ankle Swelling: Population Symptom Reporting Using Google Trends. *Ann Fam Med* 2016 Dec;14(4):356-358 [FREE Full text] [doi: 10.1370/afm.1953] [Medline: 27401424]
63. Lockett T, Disler R, Hosie A, Johnson M, Davidson P, Currow D, et al. Content and quality of websites supporting self-management of chronic breathlessness in advanced illness: a systematic review. *NPJ Prim Care Respir Med* 2016 Dec 26;26:16025 [FREE Full text] [doi: 10.1038/npjpcrm.2016.25] [Medline: 27225898]
64. Majumder MS, Santillana M, Mekar SR, McGinnis DP, Khan K, Brownstein JS. Utilizing Nontraditional Data Sources for Near Real-Time Estimation of Transmission Dynamics During the 2015-2016 Colombian Zika Virus Disease Outbreak. *JMIR Public Health Surveill* 2016 Jun 01;2(1):e30 [FREE Full text] [doi: 10.2196/publichealth.5814] [Medline: 27251981]
65. Mattin MJ, Solano-Gallego L, Dhollander S, Afonso A, Brodbelt DC. The frequency and distribution of canine leishmaniosis diagnosed by veterinary practitioners in Europe. *Vet J* 2014 Jun;200(3):410-419. [doi: 10.1016/j.tvjl.2014.03.033] [Medline: 24767097]
66. Mavragani A, Sypsa K, Sampri A, Tsagarakis K. Quantifying the UK Online Interest in Substances of the EU Watchlist for Water Monitoring: Diclofenac, Estradiol, and the Macrolide Antibiotics. *Water* 2016 Nov 18;8(11):542. [doi: 10.3390/w8110542]
67. Murray G, O'Rourke C, Hogan J, Fenton JE. Detecting internet search activity for mouth cancer in Ireland. *Br J Oral Maxillofac Surg* 2016 Feb;54(2):163-165. [doi: 10.1016/j.bjoms.2015.12.005] [Medline: 26774361]

68. Myers L, Jones J, Boesten N, Lancman M. Psychogenic non-epileptic seizures (PNES) on the Internet: Online representation of the disorder and frequency of search terms. *Seizure* 2016 Aug 01;40:114-122 [FREE Full text]
69. Noar S, Ribisl K, Althouse B, Willoughby J, Ayers J. Using digital surveillance to examine the impact of public figure pancreatic cancer announcements on media and search query outcomes. *Journal of the National Cancer Institute - Monographs* 2013:188-194.
70. Nuti SV, Wayda B, Ranasinghe I, Wang S, Dreyer RP, Chen SI, et al. The use of google trends in health care research: a systematic review. *PLoS One* 2014 Oct;9(10):e109583 [FREE Full text] [doi: 10.1371/journal.pone.0109583] [Medline: 25337815]
71. Pandey A, Abdullah K, Drazner MH. Impact of Vice President Cheney on public interest in left ventricular assist devices and heart transplantation. *Am J Cardiol* 2014 May 01;113(9):1529-1531. [doi: 10.1016/j.amjcard.2014.02.007] [Medline: 24630787]
72. Parker J, Cuthbertson C, Loveridge S, Skidmore M, Dyar W. Forecasting state-level premature deaths from alcohol, drugs, and suicides using Google Trends data. *J Affect Disord* 2017 Dec 15;213:9-15. [doi: 10.1016/j.jad.2016.10.038] [Medline: 28171770]
73. Phelan N, Kelly JC, Moore DP, Kenny P. The effect of the metal-on-metal hip controversy on Internet search activity. *Eur J Orthop Surg Traumatol* 2014 Oct;24(7):1203-1210. [doi: 10.1007/s00590-013-1399-3] [Medline: 24390041]
74. Phelan N, Davy S, O'Keeffe GW, Barry DS. Googling in anatomy education: Can google trends inform educators of national online search patterns of anatomical syllabi? *Anat Sci Educ* 2017 Mar;10(2):152-159. [doi: 10.1002/ase.1641] [Medline: 27547967]
75. Plante DT, Ingram DG. Seasonal trends in tinnitus symptomatology: evidence from Internet search engine query data. *Eur Arch Otorhinolaryngol* 2015 Oct;272(10):2807-2813. [doi: 10.1007/s00405-014-3287-9] [Medline: 25234771]
76. Poletto C, Boëlle P, Colizza V. Risk of MERS importation and onward transmission: a systematic review and analysis of cases reported to WHO. *BMC Infect Dis* 2016 Aug 25;16(1):448 [FREE Full text] [doi: 10.1186/s12879-016-1787-5] [Medline: 27562369]
77. Pollett S, Wood N, Boscardin WJ, Bengtsson H, Schwarcz S, Harriman K, et al. Validating the Use of Google Trends to Enhance Pertussis Surveillance in California. *PLoS Curr* 2015 Oct 19:1-10. [doi: 10.1371/currents.outbreaks.7119696b3e7523faa4543faac87c56c2]
78. Rohart F, Milinovich GJ, Avril SMR, Lê CK, Tong S, Hu W. Disease surveillance based on Internet-based linear models: an Australian case study of previously unmodeled infection diseases. *Sci Rep* 2016 Dec 20;6:38522 [FREE Full text] [doi: 10.1038/srep38522] [Medline: 27994231]
79. Rosenkrantz AB, Prabhu V. Public Interest in Imaging-Based Cancer Screening Examinations in the United States: Analysis Using a Web-Based Search Tool. *AJR Am J Roentgenol* 2016 Jan;206(1):113-118. [doi: 10.2214/AJR.15.14840] [Medline: 26700342]
80. Rossignol L, Pelat C, Lambert B, Flahault A, Chartier-Kastler E, Hanslik T. A method to assess seasonality of urinary tract infections based on medication sales and google trends. *PLoS One* 2013;8(10):e76020 [FREE Full text] [doi: 10.1371/journal.pone.0076020] [Medline: 24204587]
81. Scatà M, Di SA, Liò P, La CA. The Impact of Heterogeneity and Awareness in Modeling Epidemic Spreading on Multiplex Networks. *Sci Rep* 2016 Dec 16;6:37105 [FREE Full text] [doi: 10.1038/srep37105] [Medline: 27848978]
82. Scheres LJJ, Lijfering WM, Middeldorp S, Cannegieter SC. Influence of World Thrombosis Day on digital information seeking on venous thrombosis: a Google Trends study. *J Thromb Haemost* 2016 Dec;14(12):2325-2328. [doi: 10.1111/jth.13529] [Medline: 27735128]
83. Shin S, Seo D, An J, Kwak H, Kim S, Gwack J, et al. High correlation of Middle East respiratory syndrome spread with Google search and Twitter trends in Korea. *Sci Rep* 2016 Sep 06;6:32920 [FREE Full text] [doi: 10.1038/srep32920] [Medline: 27595921]
84. Schootman M, Toor A, Cavazos-Rehg P, Jeffe DB, McQueen A, Eberth J, et al. The utility of Google Trends data to examine interest in cancer screening. *BMJ Open* 2015 Jun 08;5(6):e006678 [FREE Full text] [doi: 10.1136/bmjopen-2014-006678] [Medline: 26056120]

85. Schuster N, Rogers M, McMahon JL. Using search engine query data to track pharmaceutical utilization: a study of statins. *The American journal of managed care* 2010;16(8):215-219.
86. Seifter A, Schwarzwalder A, Geis K, Aucott J. The utility of "Google Trends" for epidemiological research: Lyme disease as an example. *Geospat Health* 2010 May;4(2):135-137. [doi: 10.4081/gh.2010.195] [Medline: 20503183]
87. Sentana-Lledo D, Barbu CM, Ngo MN, Wu Y, Sethuraman K, Levy MZ. Seasons, Searches, and Intentions: What The Internet Can Tell Us About The Bed Bug (Hemiptera: Cimicidae) Epidemic. *J Med Entomol* 2016 Jan;53(1):116-121. [doi: 10.1093/jme/tjv158] [Medline: 26474879]
88. Simmering JE, Polgreen LA, Polgreen PM. Web search query volume as a measure of pharmaceutical utilization and changes in prescribing patterns. *Res Social Adm Pharm* 2014;10(6):896-903. [doi: 10.1016/j.sapharm.2014.01.003] [Medline: 24603135]
89. Skeldon SC, Kozhimannil KB, Majumdar SR, Law MR. The effect of competing direct-to-consumer advertising campaigns on the use of drugs for benign prostatic hyperplasia: time series analysis. *J Gen Intern Med* 2015 Apr;30(4):514-520 [FREE Full text] [doi: 10.1007/s11606-014-3063-y] [Medline: 25338730]
90. Solano P, Ustulin M, Pizzorno E, Vichi M, Pompili M, Serafini G, et al. A Google-based approach for monitoring suicide risk. *Psychiatry Res* 2016 Dec 30;246:581-586. [doi: 10.1016/j.psychres.2016.10.030] [Medline: 27837725]
91. Stein JD, Childers DM, Nan B, Mian SI. Gauging interest of the general public in laser-assisted in situ keratomileusis eye surgery. *Cornea* 2013 Jul;32(7):1015-1018 [FREE Full text] [doi: 10.1097/ICO.0b013e318283c85a] [Medline: 23538615]
92. Takada K. Japanese Interest in "Hotaru" (Fireflies) and "Kabuto-Mushi" (Japanese Rhinoceros Beetles) Corresponds with Seasonality in Visible Abundance. *Insects* 2012 Apr 10;3(2):424-431 [FREE Full text] [doi: 10.3390/insects3020424] [Medline: 26466535]
93. Telfer S, Woodburn J. Let me Google that for you: a time series analysis of seasonality in internet search trends for terms related to foot and ankle pain. *J Foot Ankle Res* 2015 Jul;8:27 [FREE Full text] [doi: 10.1186/s13047-015-0074-9] [Medline: 26146521]
94. Troelstra SA, Bosdriesz JR, de BMR, Kunst AE. Effect of Tobacco Control Policies on Information Seeking for Smoking Cessation in the Netherlands: A Google Trends Study. *PLoS One* 2016 Feb;11(2):e0148489 [FREE Full text] [doi: 10.1371/journal.pone.0148489] [Medline: 26849567]
95. Toosi B, Kalia S. Seasonal and Geographic Patterns in Tanning Using Real-Time Data From Google Trends. *JAMA Dermatol* 2016 Feb;152(2):215-217. [doi: 10.1001/jamadermatol.2015.3008] [Medline: 26719968]
96. Wang H, Chen D, Yu H, Chen Y. Forecasting the Incidence of Dementia and Dementia-Related Outpatient Visits With Google Trends: Evidence From Taiwan. *J Med Internet Res* 2015 Nov 19;17(11):e264 [FREE Full text] [doi: 10.2196/jmir.4516] [Medline: 26586281]
97. Warren KE, Wen LS. Measles, social media and surveillance in Baltimore City. *J Public Health (Oxf)* 2017 Sep 01;39(3):e73-e78. [doi: 10.1093/pubmed/fdw076] [Medline: 27521926]
98. Willson TJ, Lospinoso J, Weitzel E, McMains K. Correlating Regional Aeroallergen Effects on Internet Search Activity. *Otolaryngol Head Neck Surg* 2014 Dec 12;152(2):228-232. [doi: 10.1177/0194599814560149] [Medline: 25505261]
99. Willson TJ, Shams A, Lospinoso J, Weitzel E, McMains K. Searching for Cedar: Geographic Variation in Single Aeroallergen Shows Dose Response in Internet Search Activity. *Otolaryngol Head Neck Surg* 2015 Nov 02;153(5):770-774. [doi: 10.1177/0194599815601650] [Medline: 26340925]
100. Yang S, Santillana M, Kou SC. Accurate estimation of influenza epidemics using Google search data via ARGO. *PNAS* 2015;112(47):14473.
101. Zhang Z, Zheng X, Zeng DD, Leischow SJ. Information seeking regarding tobacco and lung cancer: effects of seasonality. *PLoS One* 2015 Mar;10(3):e0117938 [FREE Full text] [doi: 10.1371/journal.pone.0117938] [Medline: 25781020]

102. Zhang Z, Zheng X, Zeng DD, Leischow SJ. Tracking Dabbing Using Search Query Surveillance: A Case Study in the United States. *J Med Internet Res* 2016 Sep 16;18(9):e252 [FREE Full text] [doi: 10.2196/jmir.5802] [Medline: 27637361]
103. Zheluk A, Quinn C, Meylakhs P. Internet search and krokodil in the Russian Federation: an infoveillance study. *J Med Internet Res* 2014 Sep 18;16(9):e212 [FREE Full text] [doi: 10.2196/jmir.3203] [Medline: 25236385]
104. Zhou X, Ye J, Feng Y. Tuberculosis surveillance by analyzing Google trends. *IEEE Trans Biomed Eng* 2011 Aug;58(8):2247-2254. [doi: 10.1109/TBME.2011.2132132] [Medline: 21435969]
